# Supplementary material for: Soluble precipitable porphyrins for use in targeted molecular brachytherapy
Source: Royal Society of Chemistry journal article supplement (doi:10.1039/b714127k), 2007-11-02
Supplement: b714127k.pdf [file b714127k.pdf]

Supplementary Information for:

**Soluble Precipitable Porphyrins for Use in Targeted Molecular Brachytherapy**

Zhen Yao, K. Eszter Borbas, and Jonathan S. Lindsey

Department of Chemistry  
North Carolina State University  
Raleigh, NC 27695-8204, USA  
Email: [jlindsey@ncsu.edu](mailto:jlindsey@ncsu.edu)

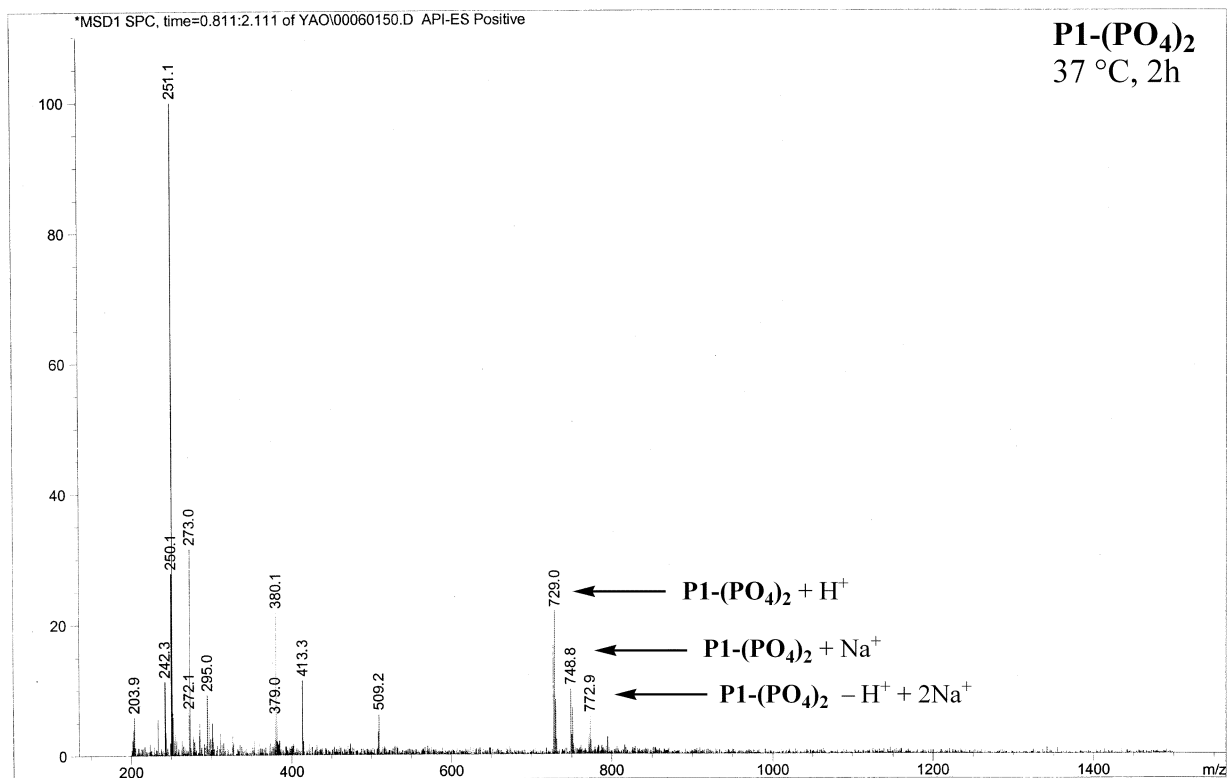

(a)

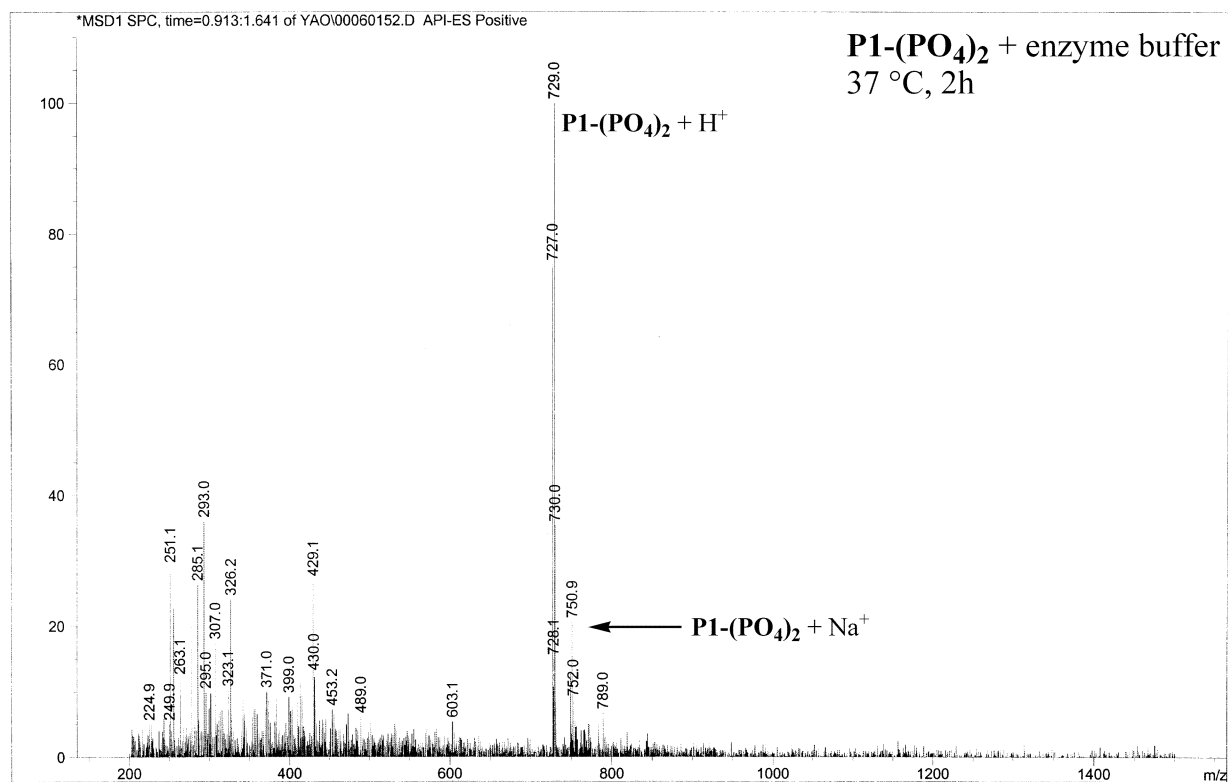

(b)

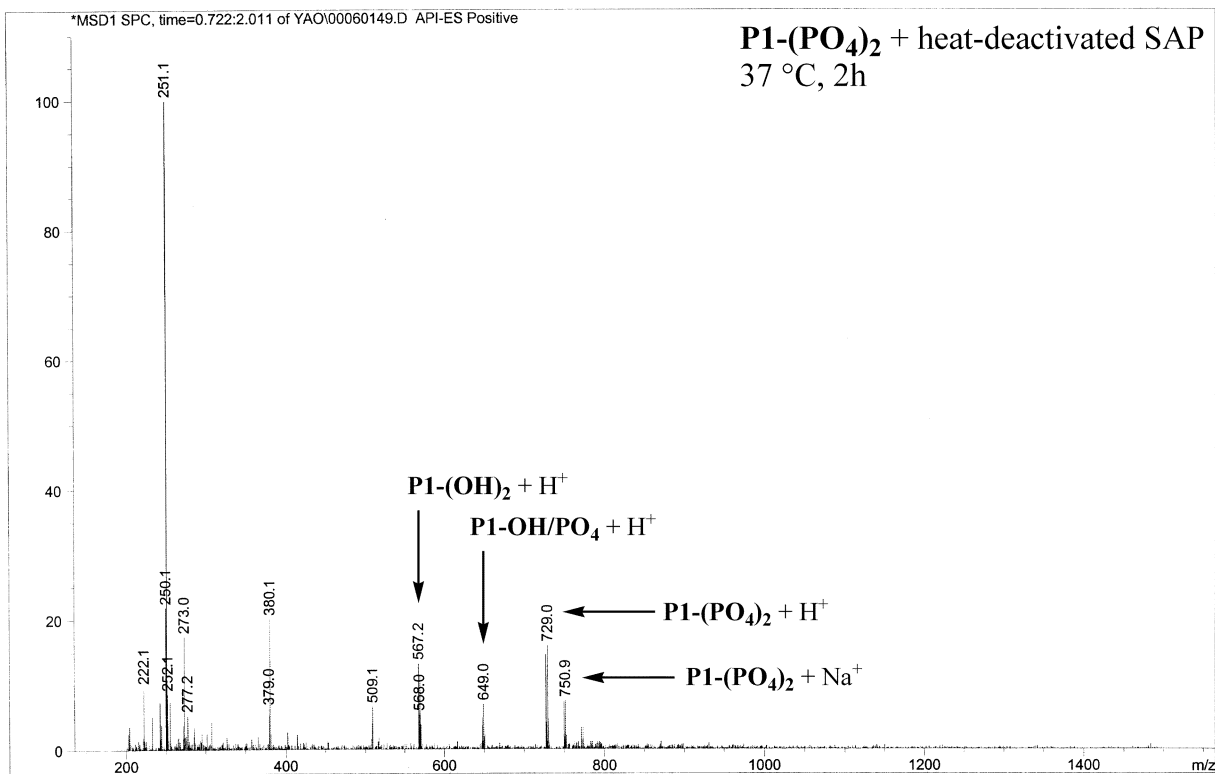

(c)

**Figure S1.** ESI-MS analysis of samples from the three control reactions: (a) without enzyme (NE), (b) without the buffer (MZ), and (c) with deactivated SAP (dE).

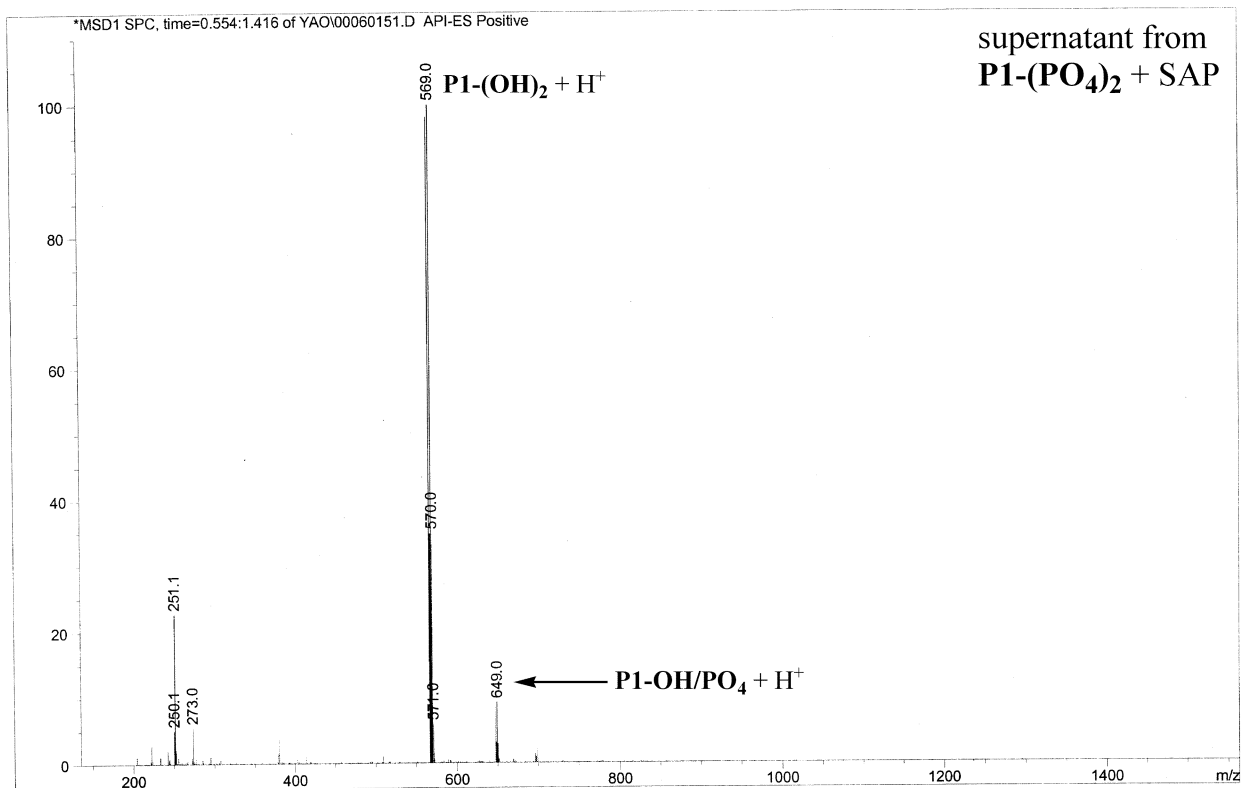

(a)

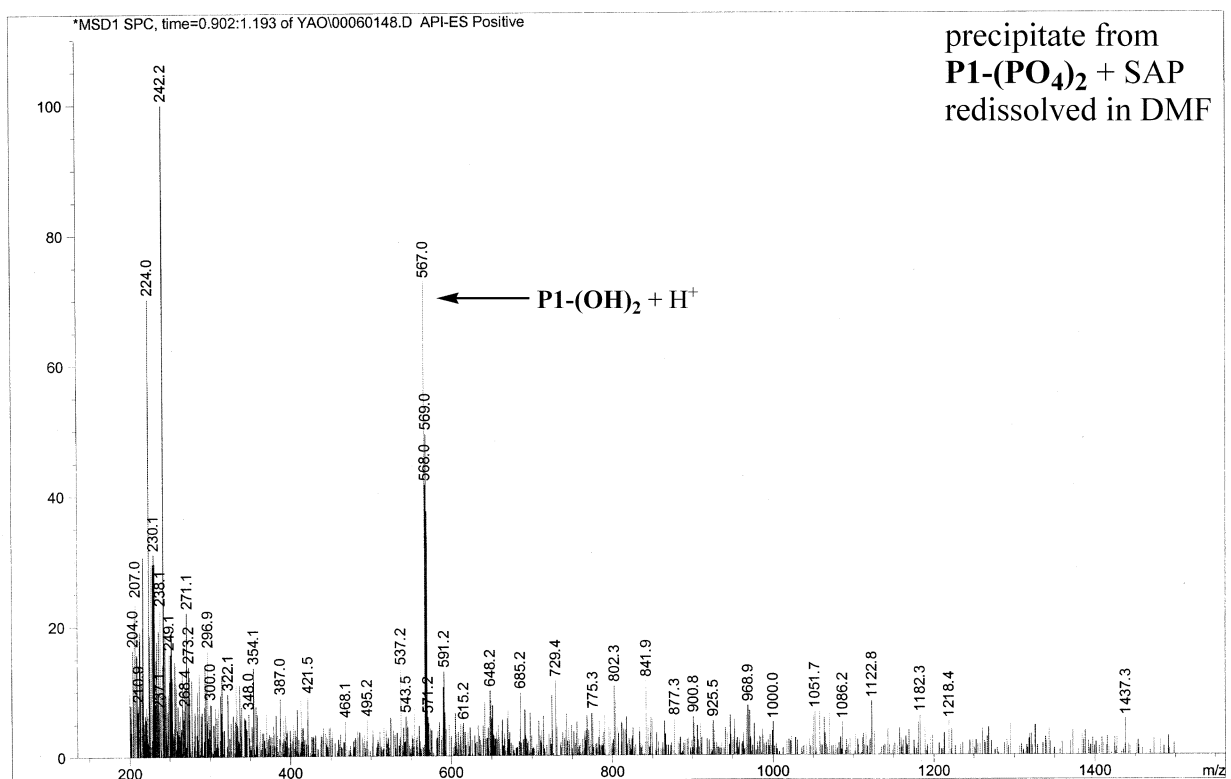

(b)

**Figure S2.** ESI-MS analysis of samples from the enzymatic reaction (E): (a) the supernatant upon centrifugation and (b) the solution obtained by dissolving the precipitate in DMF.
